# Supplementary material for: Waste animal fat with hydrothermal liquefaction as a potential route to marine biofuels
Source: PeerJ. 2023 Dec 18;11:e16504. doi: 10.7717/peerj.16504 (PMC10734409; doi:10.7717/peerj.16504)
Supplement: Supplemental Information 2 [file peerj-11-16504-s002.xlsx]

## Sheet: Final Data
No.	Name	Date	AF quantity (g)	Solid load	Temp.		Total hydrolysate (ml)	Oil Yield (g)	Oil Yield %
1	AF1005	2019-05-10	50	0.5	330		100	13.88	0.28
2	AF1306	2019-06-13	50	0.5	330		92.5	12.5	0.25
3	AF0302	2019-02-03	35	0.5	330			6.9	0.2
4	AF2406	2019-06-24	50	0.5	330			11.29	0.23
5	AF2703	2019-03-27	50	0.5	330		86
6	AF1704	2019-04-17	50	0.5	330		99	7.15	0.14
7	AF0705	2019-05-07	50	0.5	330		99	3.89	0.08
8	AF1205	2019-05-12	50	0.5	330		93
9	AF1505	2019-05-15	50	0.5	330		93+	9.37	0.19
10	AF1605	2019-05-16	50	0.5	330		98.5	6.28	0.13
11	AF0304	2019-04-03	50	0.5	330		88	3.74	0.075
12	AF2306	2019-06-23	50	0.5	330		87.5	5.54	0.11
13	AF2003	2019-03-20	50	0.5	330			4.2	0.08
14	AF2006	2019-06-20	50	0.5	330		97.5	4.88	0.1
15	AF1404	2019-04-14	75	0.75	330		99.5	19.93	0.27
16	AF1104	2019-04-11	25	0.25	330		85	No Oil
17	AF1504	2019-04-15	25	0.25	330		99.5	No Oil
	RT		Oil Yield %
	20	28	0.28
	20	25	0.25
	40	20	0.2
	40	23	0.23
	60	19	0.19
	60	13	0.13
	80	7.5	0.075
	80	11	0.11
	120	8	0.08
	120	10	0.1
			Heat required for the reaction MJ		%recuperation	kg fat required for combusiotn	output solid fat resedue kg	electricity co-generated kwh
			1.27185		0	0.111566	0.255434	0.80894
			0.635925		0.5	0.0557829	0.311217	0.9856
			0.50874		0.6	0.0446263	0.322374	1.02093
			0.25437		0.8	0.0223132	0.344687	1.0916

## Sheet: Animal Fat Oil balancesheet
No.	Name	Date	AF quantity (g)	Solid load	Temperature	Residence Time (min.)	Density of Oil fraction (g/cm3)	Density Second measurement 04/07/19		Avg. of 3 Density measurements	Oil yield wt. with tube (g)	Tube weight(g)	Oil tube wt. after density measurement	Oil tube wt. after 2nd density measurement	Oil tube wt. after approx. 2ml for Cal V	Wt. after addition to AF Oil for EU	Addition to EU Oil	Oil Yield	Oil Yield %
1	AF0302	2019-02-03	35	0.5	330	40	0				20.22	-13.32	-20.22					6.9	0.197143
2	AF0402	2019-02-04	80	1	330	170													0
3	AF2003	2019-03-20	50	0.5	330	120					11.2	-7	4.2					4.2	0.084
4	AF2703	2019-03-27	50	0.5	330	60
5	AF0304	2019-04-03	50	0.5	330	80	0.8954	0.8992	0.8989		10.74	-7	10.53	10.23				3.74	0.0748
6	AF1104	2019-04-11	25	0.25	330	60	NO OIL COULD BE EXTRACTED											0	0
7	AF1404	2019-04-14	75	0.75	330	60	0.9047	0.9068	0.9031		33.25	-13.32	32.82	32.24	30.65			19.93	0.265733
8	AF1504	2019-04-15	25	0.25	330	60	NO OIL COULD BE EXTRACTED											0	0
9	AF1704	2019-04-17	50	0.5	330	60	0.8978	0.9005	0.8993		20.47	-13.32	19.4	18.82		16.11	2.71	7.15	0.143
10	AF0705	2019-05-07	50	0.5	330	60	0.8993	-	-		17.21	-13.32	16.9	-				3.89	0.0778
11	AF1005	2019-05-10	50	0.5	330	20	0.895	0.8993	0.8992		27.2	-13.32	26.85	26.54	24.99	20.27	4.72	13.88	0.2776
12	AF1205	2019-05-12	50	0.5	330	60
13	AF1505	2019-05-15	50	0.5	330	60	0.8993	0.9001	0.9002		22.69	-13.32	22.24	21.97	20.29	16.31	3.98	9.37	0.1874
14	AF1605	2019-05-16	50	0.5	330	60	0.8955	0.8985	0.8985		13.28	-7	12.94	12.69		10.34	2.35	6.28	0.1256
15	AF1306	2019-06-13	50	0.5	330	20	0.8978	0.8978	0.898		25.82	-13.32	25.44	25.2	23.05	18.88	4.17	12.5	0.25
16	AF2006	2019-06-20	50	0.5	330	120	0.8943	0.8961	0.8975		11.88	-7	11.52	11.03	9.58		17.93	4.88	0.0976
17	AF2306	2019-06-23	50	0.5	330	80	0.8981	0.898	0.8986		18.86	-13.32	18.55	18.25	16.68			5.54	0.1108
18	AF2406	2019-06-24	50	0.5	330	40	0.8967	0.8979	0.898		24.61	-13.32	24.24	23.91	22.19			11.29	0.2258
	AF oil mix for EU							0.9072
